# Supplementary material for: The underappreciated role of transboundary pollution in future air quality and health improvements in China
Source: Copernicus journal article supplement (doi:10.5194/acp-2023-48), 2023-02-17
Supplement: Supplementary file 1 [file acp-2023-48-supplement.pdf]

**Supplementary Information for  
The underappreciated role of transboundary pollution in future air quality and health  
improvements in China**

Jun-Wei Xu, Jintai Lin\*, Dan Tong, Lulu Chen

<sup>1</sup>Laboratory for Climate and Ocean–Atmosphere Studies, Department of Atmospheric and Oceanic Sciences, School of Physics, Peking University, Beijing, China

<sup>2</sup>Department of Earth System Science, Ministry of Education Key Laboratory for Earth System Modelling, Tsinghua University, Beijing, China

Correspondence: Jintai Lin ([linjt@pku.edu.cn](mailto:linjt@pku.edu.cn)).

This Supplemental Information document presents the additional data to support the primary document.

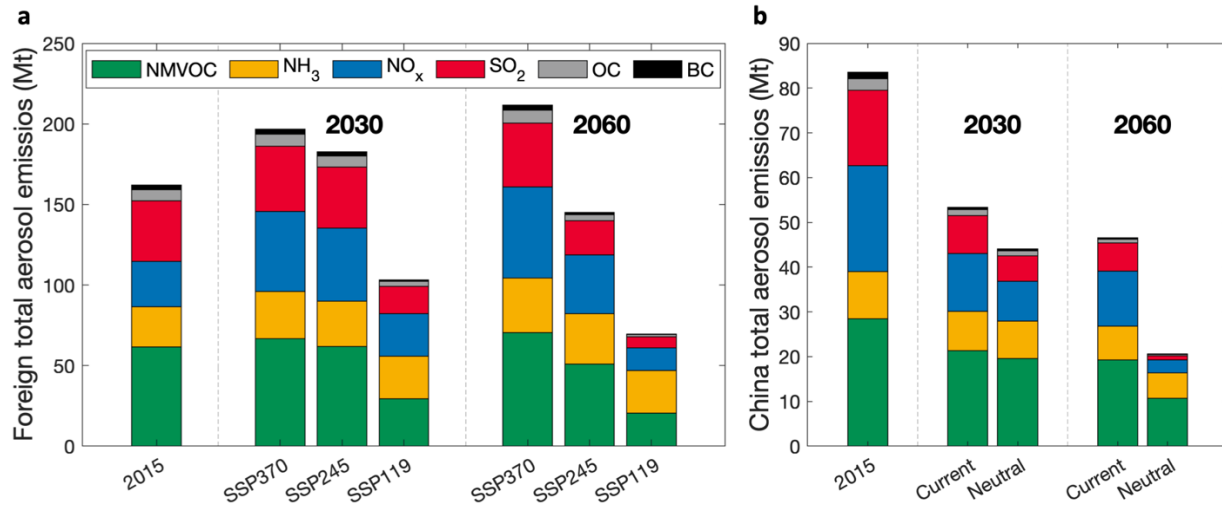

**Figure S1.** Future emissions of PM<sub>2.5</sub>-related pollutants in China and in other countries. **(a)** Emissions for foreign countries within our Flex-Grid simulation domain (11° S–60° N, 30°–150° E) for future years are projected under SSP-RCP scenarios, with updates on base year emissions and the harmonization year in this study. Colors represent the emissions of different pollutants following the legend. **(b)** Emissions for China for future years are projected with the current-policy scenario and the carbon-neutral scenario.

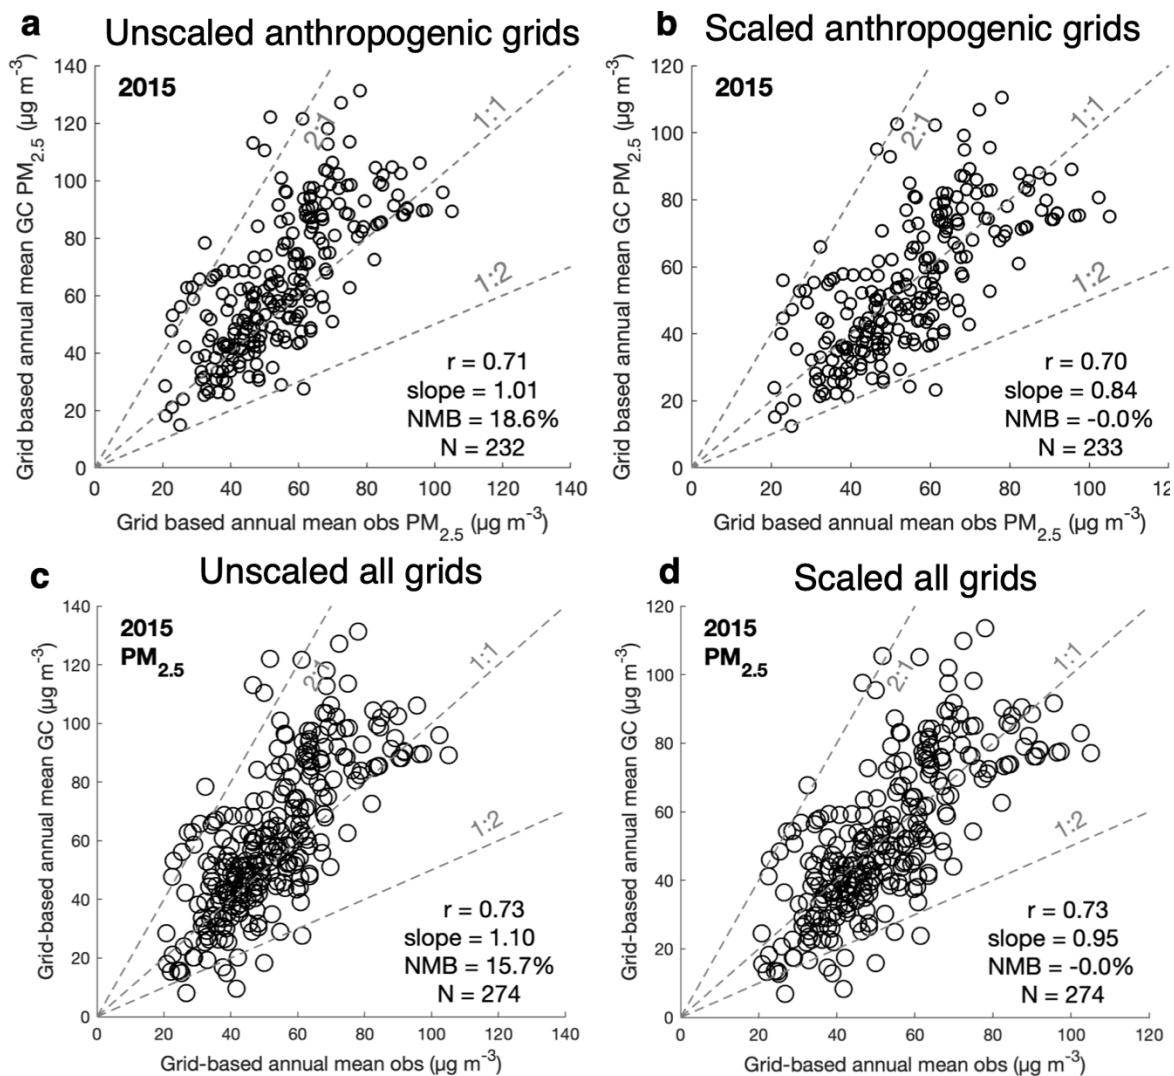

**Figure S2.** Correction and evaluation of simulated  $PM_{2.5}$  over China. **(a)** Comparison of the observed and unscaled simulated annual mean concentrations  $PM_{2.5}$  at collocated grids for 2015. Both the observed and the simulated  $PM_{2.5}$  were in grids where anthropogenic  $PM_{2.5}$  exceeds natural  $PM_{2.5}$ .  $r$  refers to the correlation coefficient. NMB refers to normalized mean bias.  $N$  indicates the number of grids shown in the figure. **(b)** Same as (a), but for scaled simulated  $PM_{2.5}$  concentrations to remove the systematic bias. **(c)** Same as (a), but for all grids (including both anthropogenic pollution-dominated and natural pollution-dominated grids). **(d)** Same as (b), but for all grids.

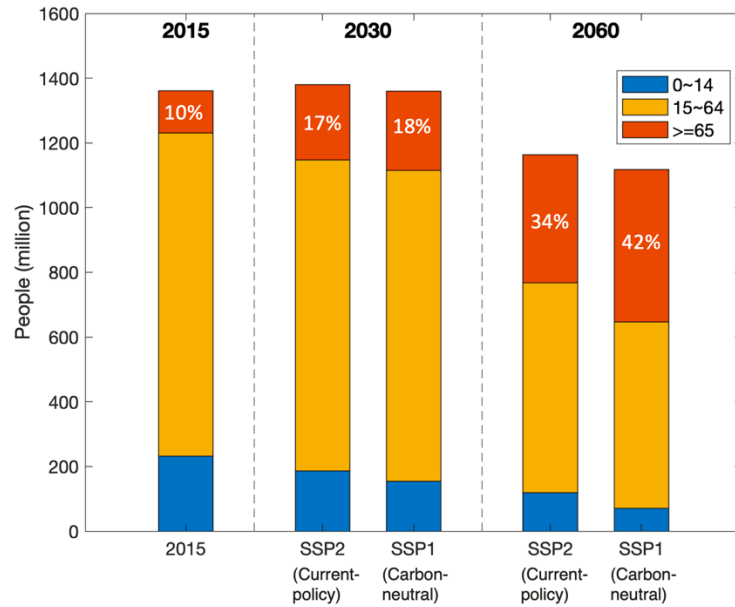

**Figure S3.** Future population and age structure in China. Total populations in China in 2015 and future years projected under different SSP scenarios (SSP1 corresponds to China’s carbon-neutral scenario; SSP2 corresponds to China’s current-policy scenario). Colors represent different age groups according to the legend. White numbers indicate the fraction of population above the age of 65 in the total population.
